# Supplementary material for: Working with the daily variation in infrastructure performance on territorial accessibility. The cases of Madrid and Barcelona
Source: Springer Nature journal article supplement (doi:10.1007/s12544-015-0168-2), 2015-05-25
Supplement: MOESM1 [file 10911232]

*Maps of Figures 2, 4, 5 and 6 on*

EUROPEAN TRANSPORT RESEARCH REVIEW

**Working with the daily variation in infrastructure  
performance on territorial accessibility.  
The cases of Madrid and Barcelona**

**Madrid**

# General information

- ***Scale (DIN A-4):***
  - 1:500,000
- ***Projection system:***
  - ETRS89 – Lambert Azimuthal Equal Area (LAEA) Europe (EPSG:3025)

on Figure 2 row 1 (Road network)

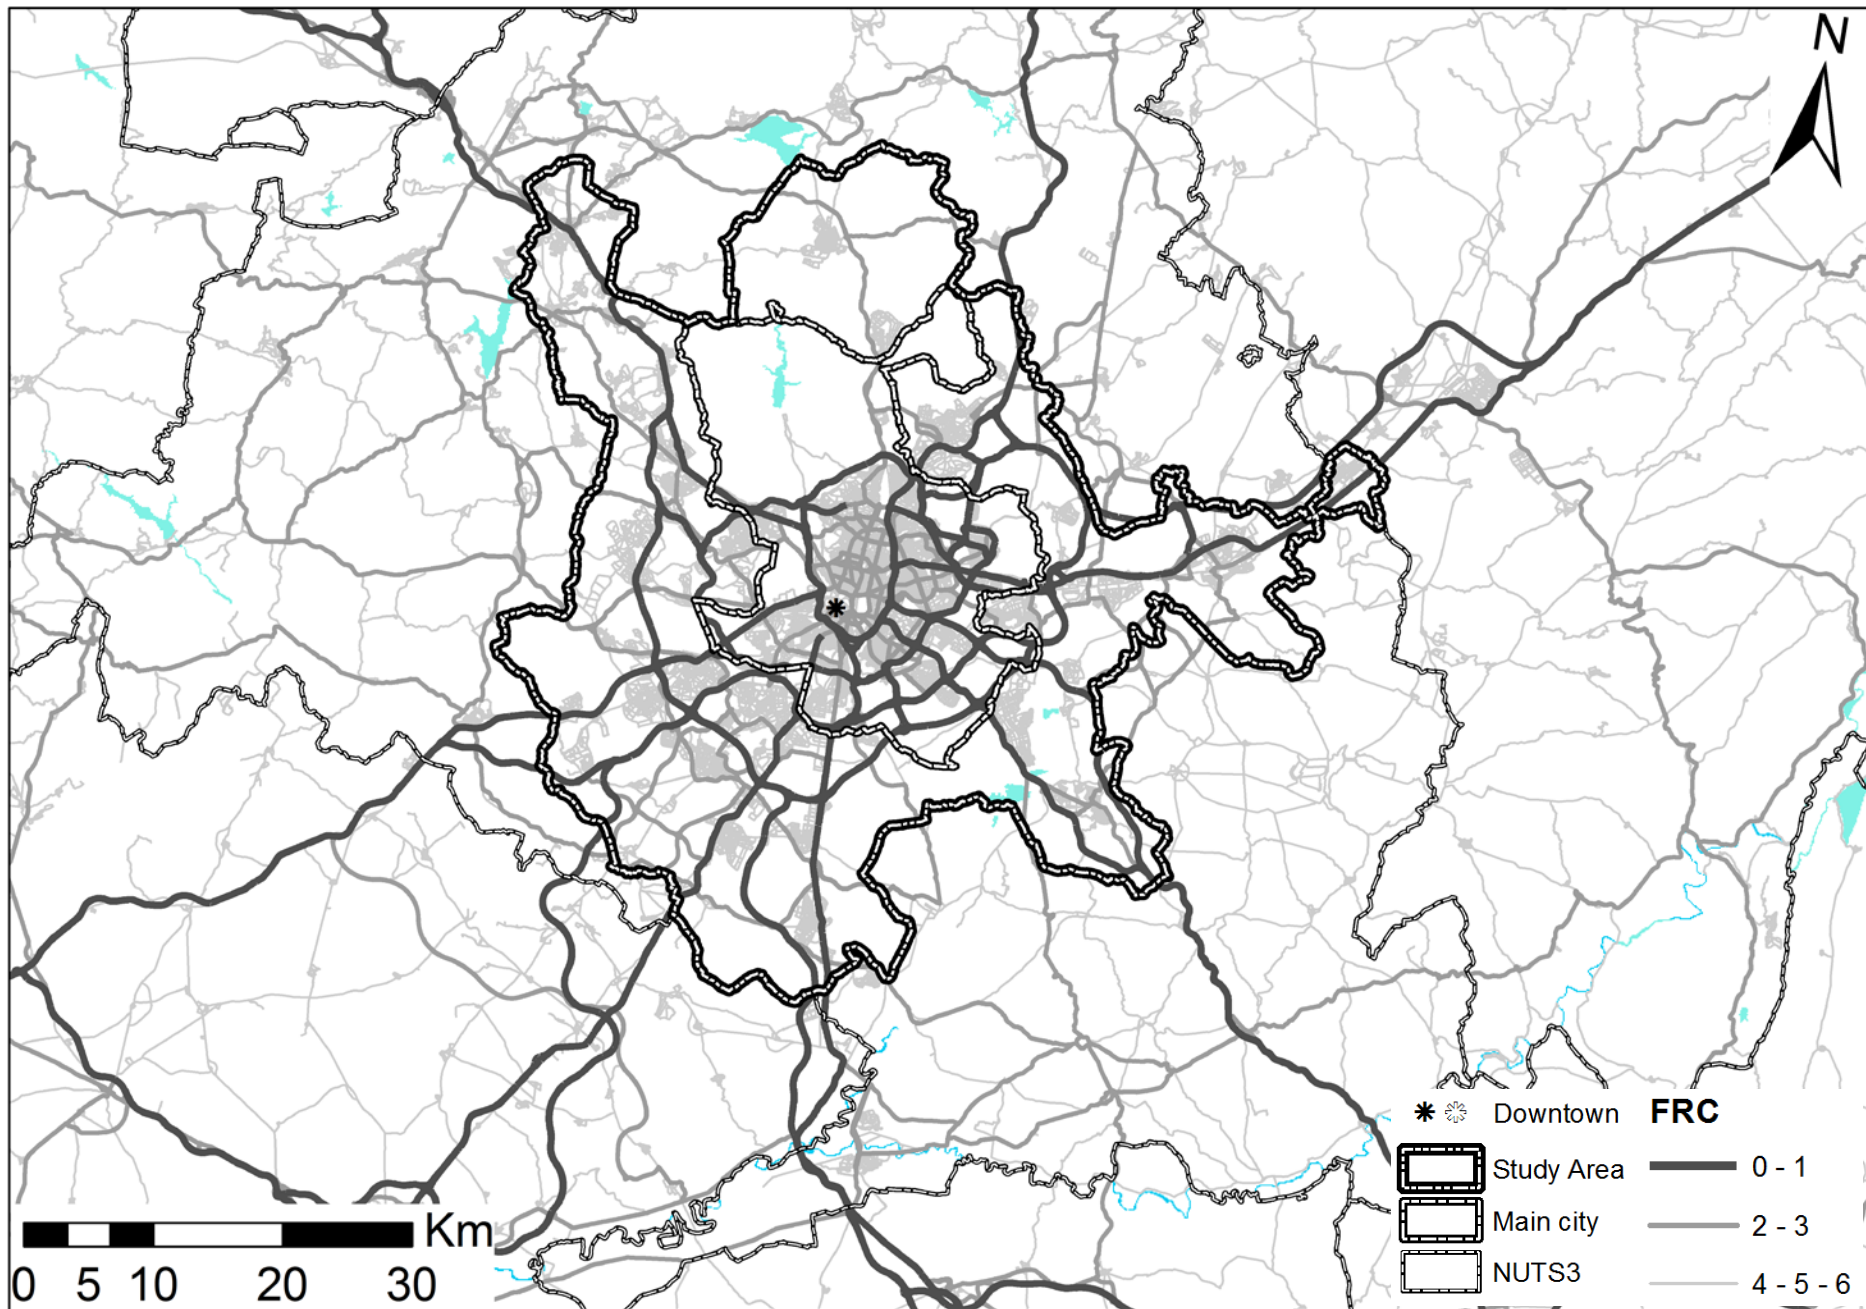

on Figure 2 Row 2 (Population)

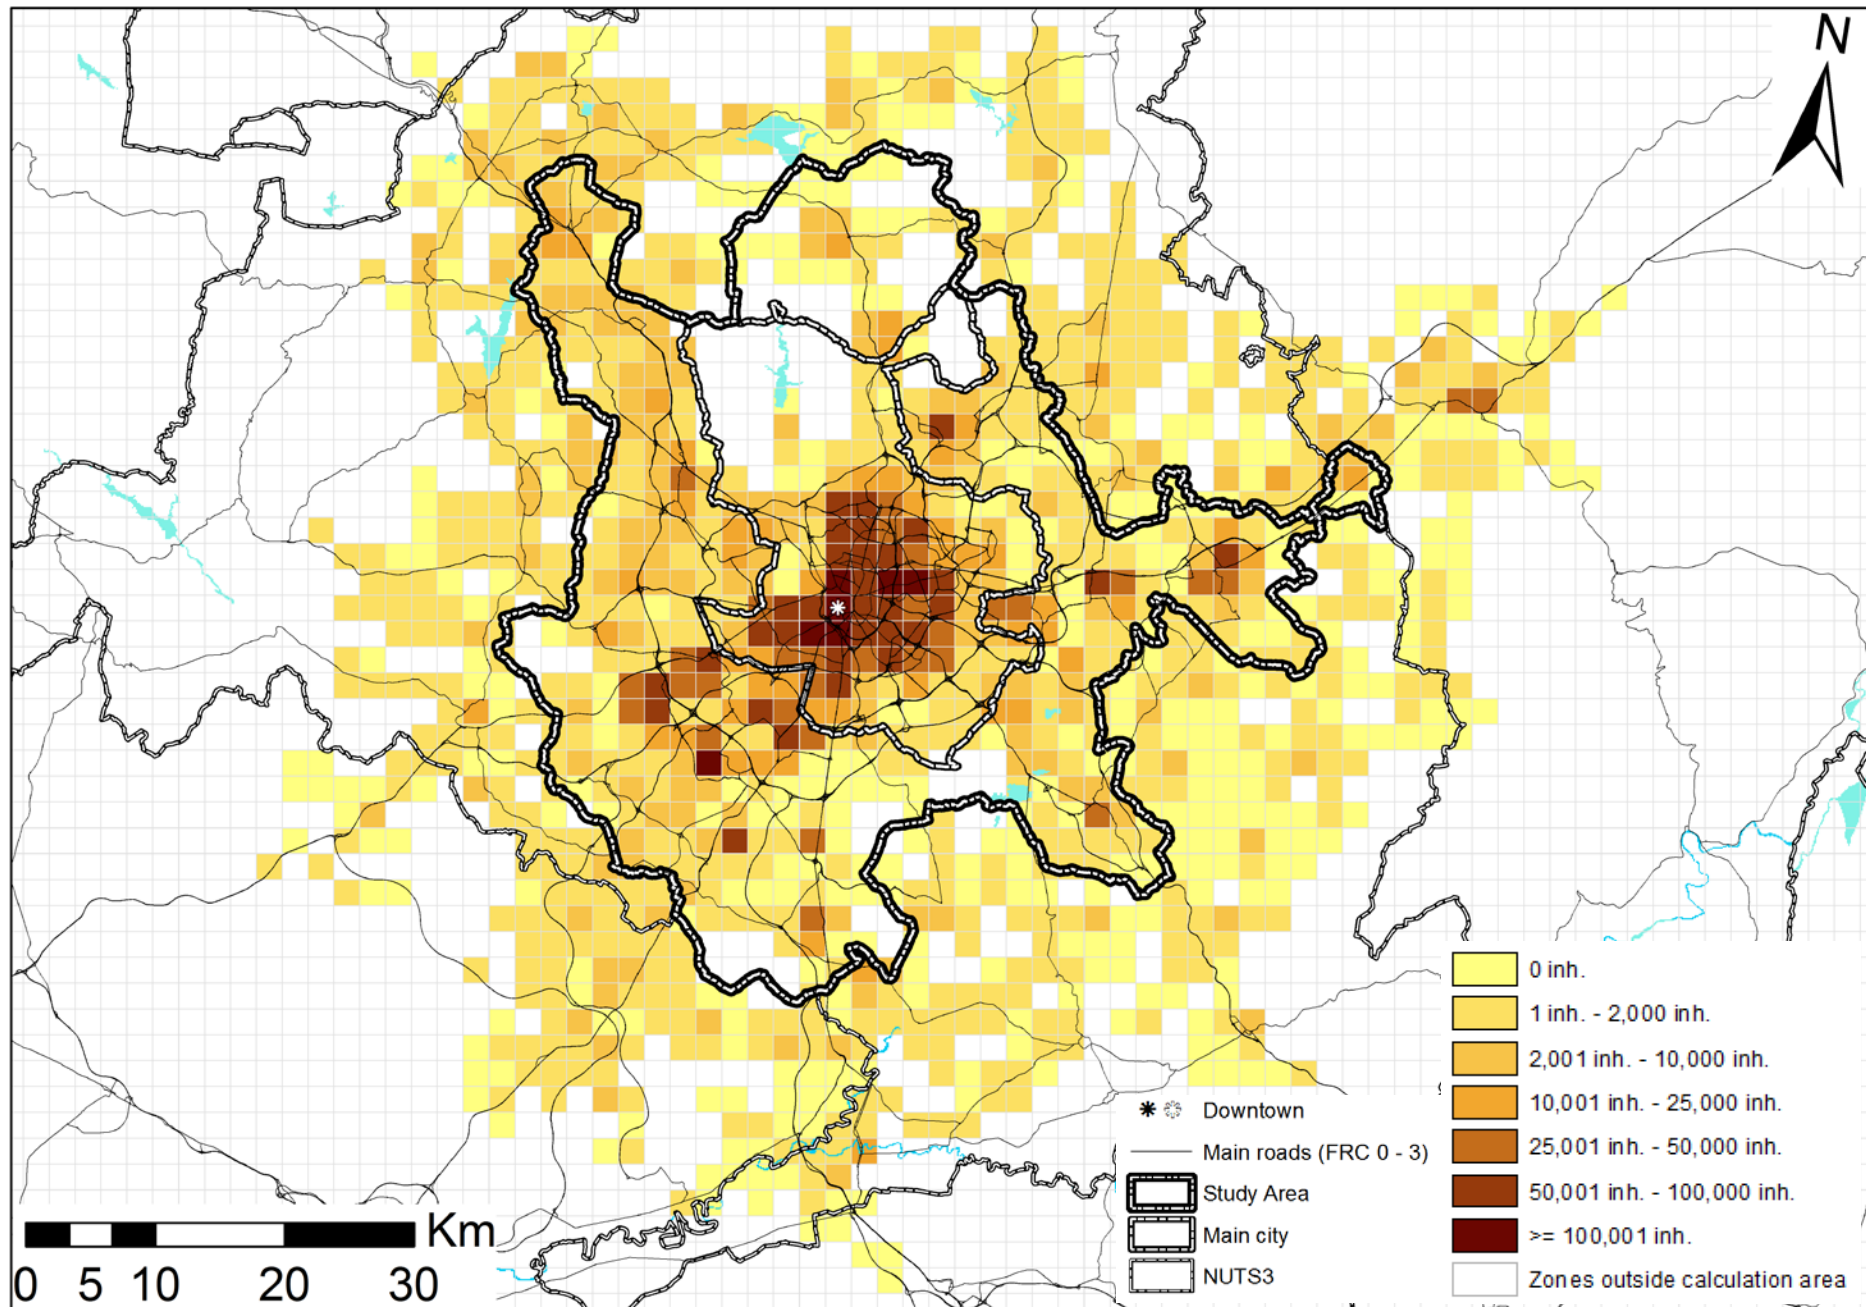

on Figure 4 Row 1 (Av. weighted impedance at 00:00)

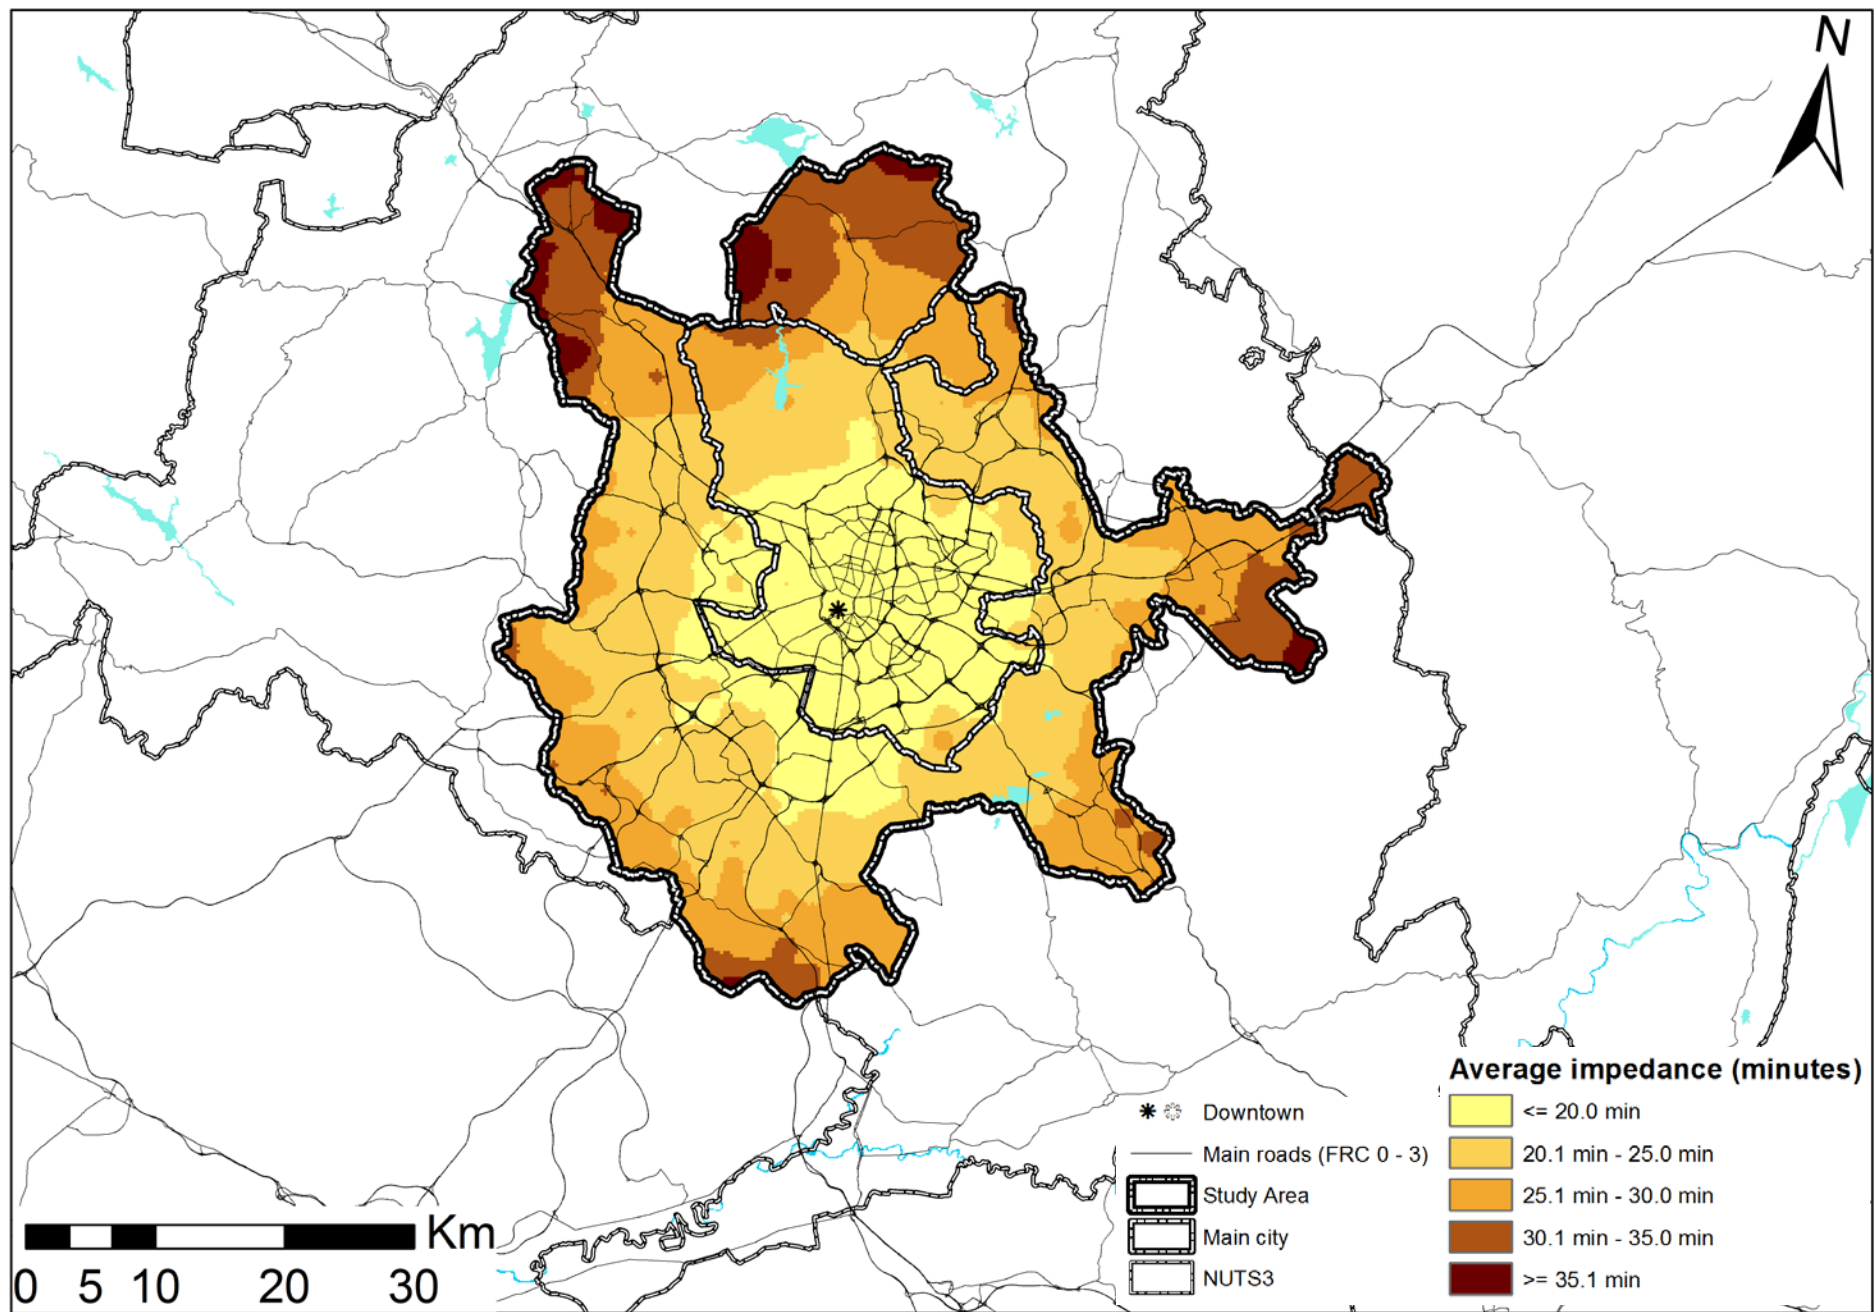



on Figure 4 Row 2 (Av. weighted impedance at 08:00)

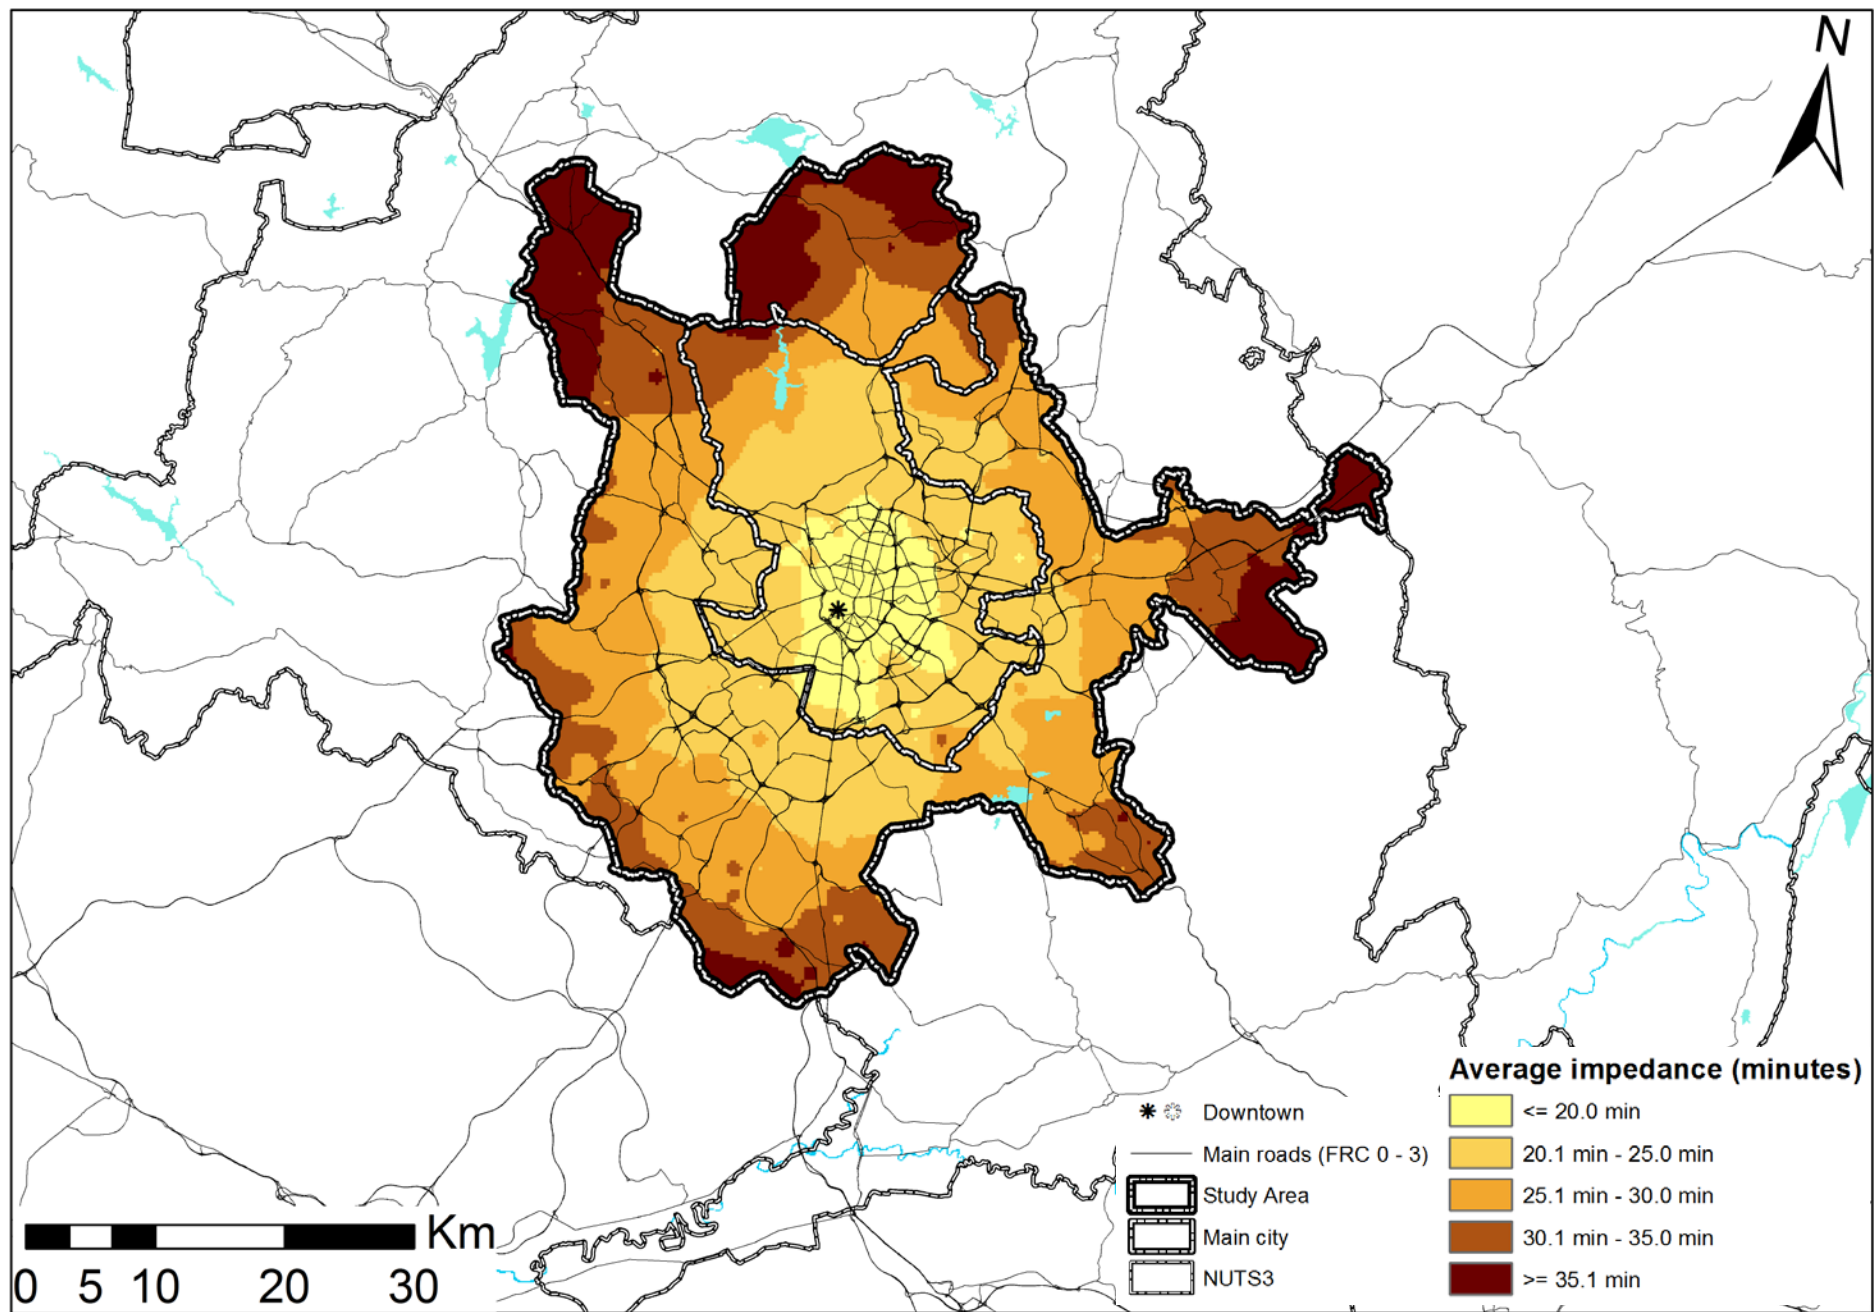

on Figure 4 Row 3 (Av. weighted impedance at 12:00)

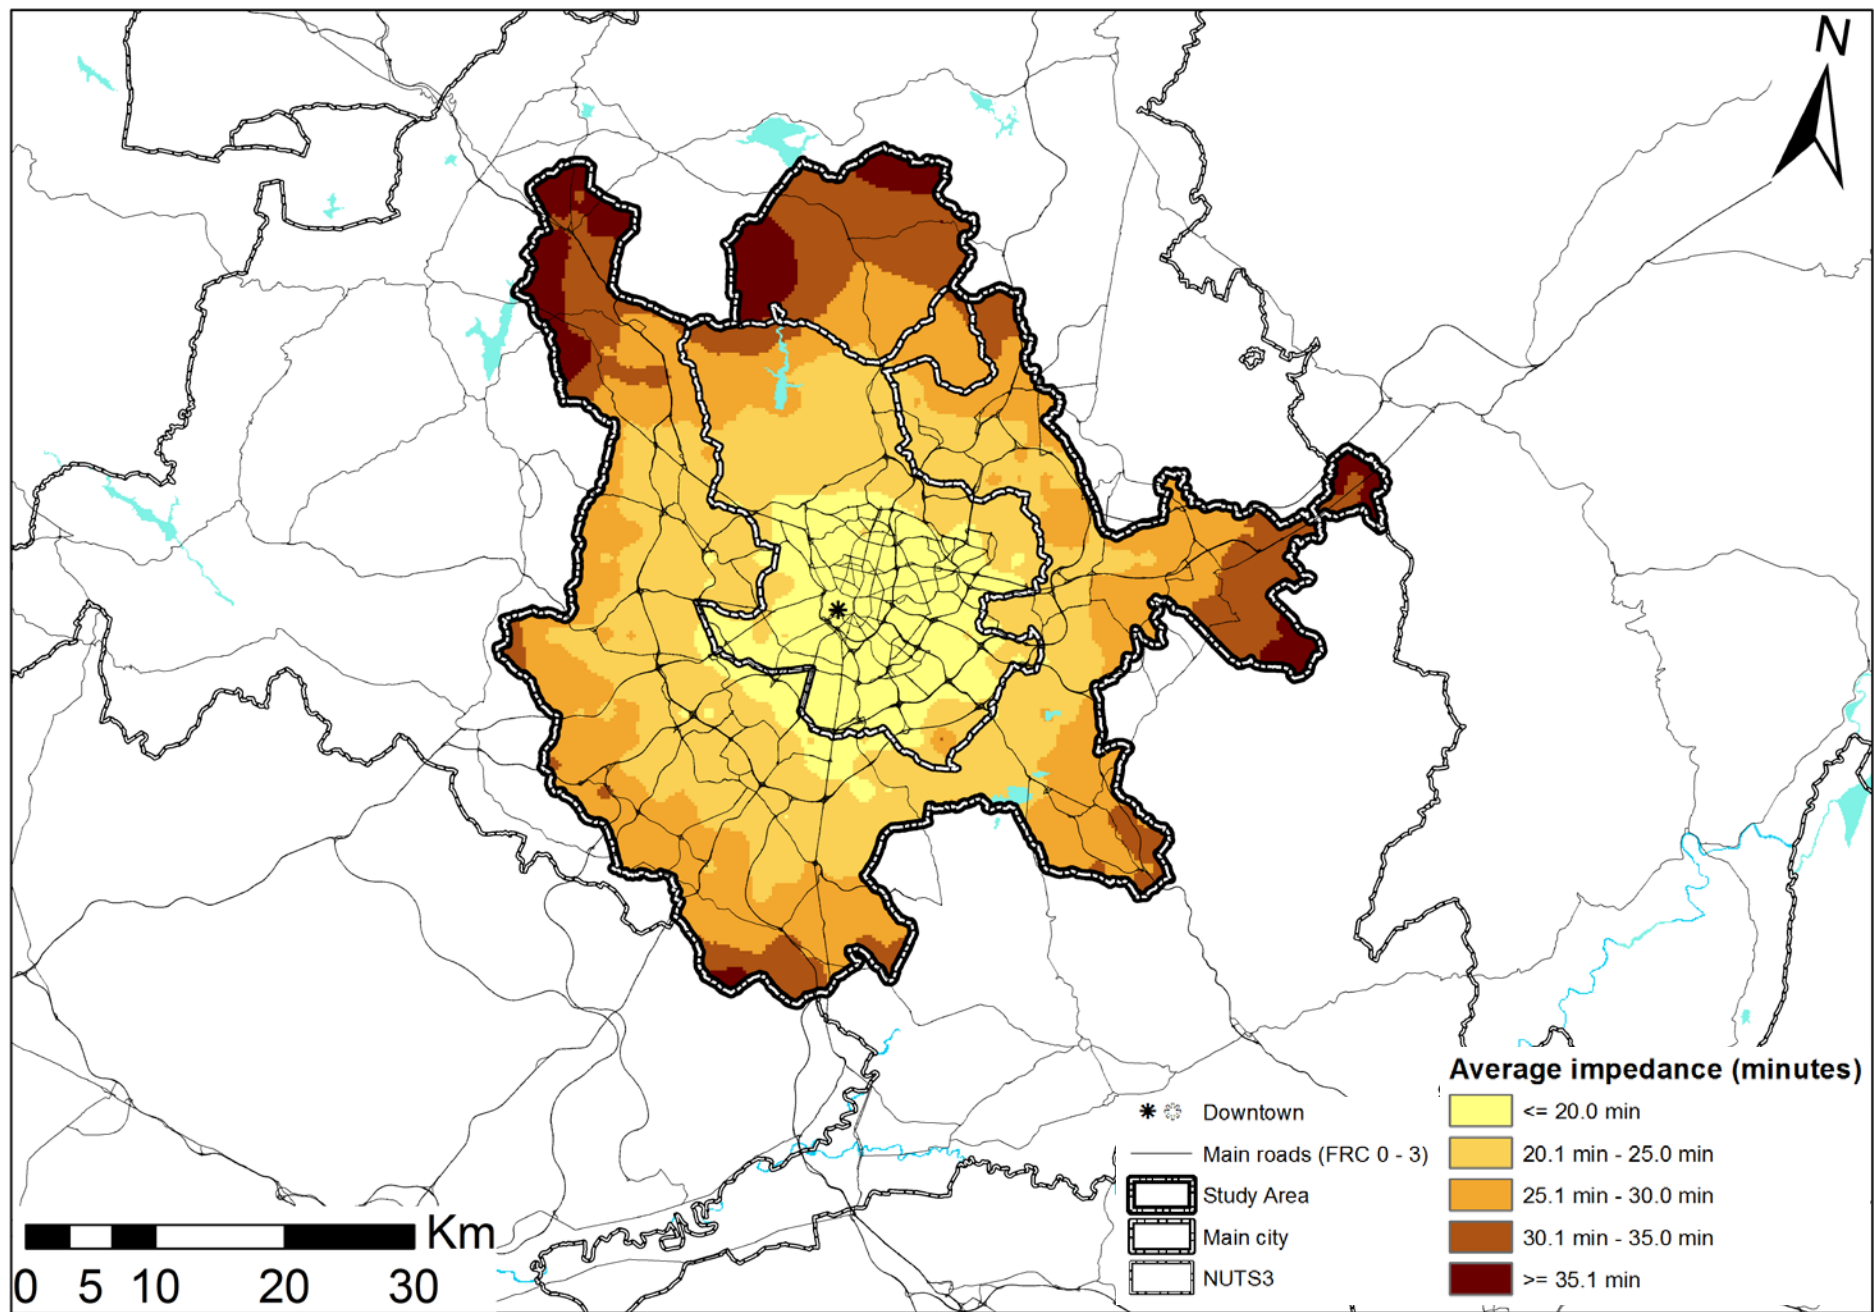

on Figure 4 Row 4 (Av. weighted impedance at 17:15)

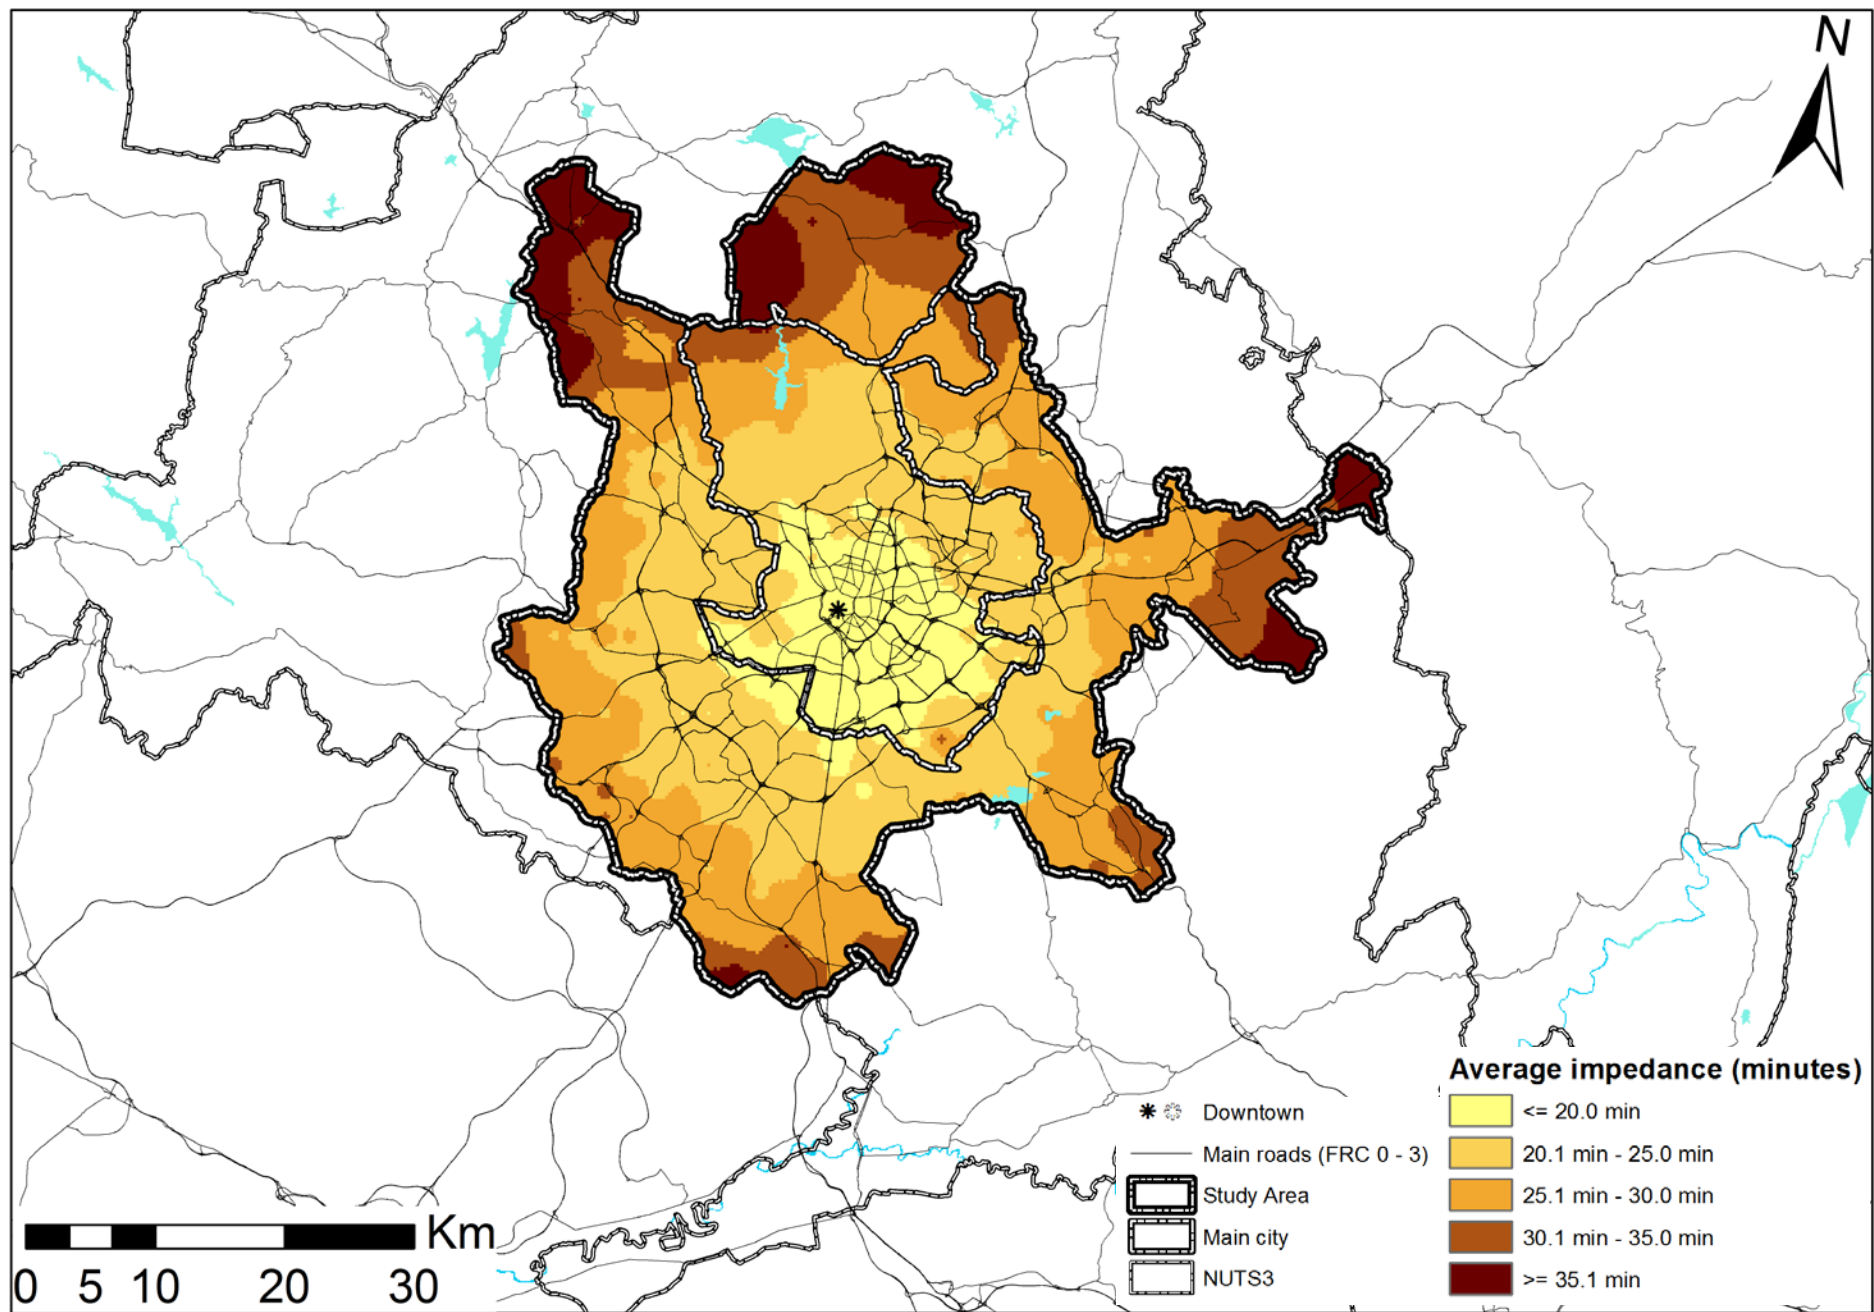



on Figure 5 Row 1 (Min. pot. acc. / Max. pot. acc.)

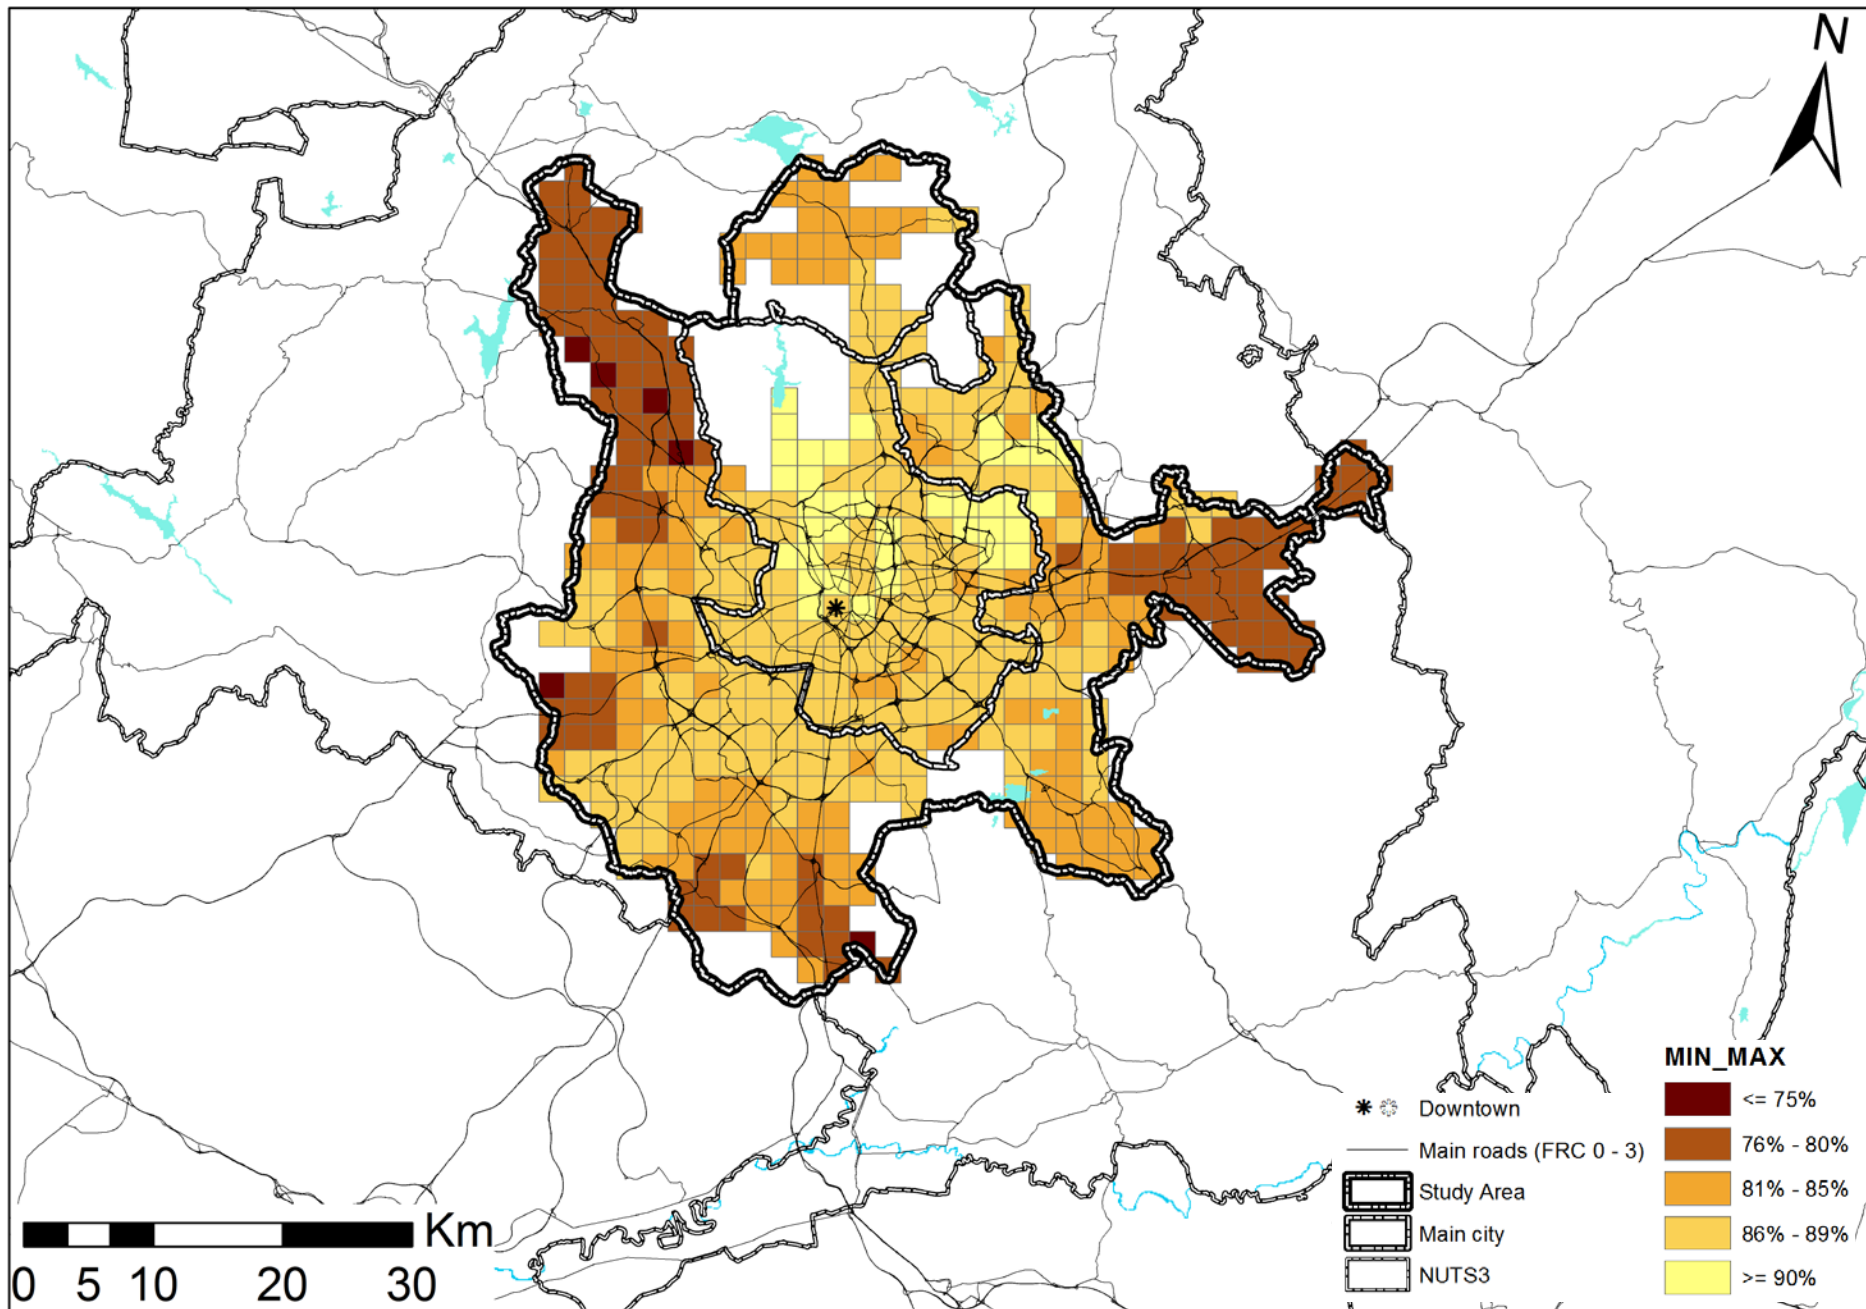

on Figure 5 Row 2 (Hours less pot. acc. than zonal av. value)

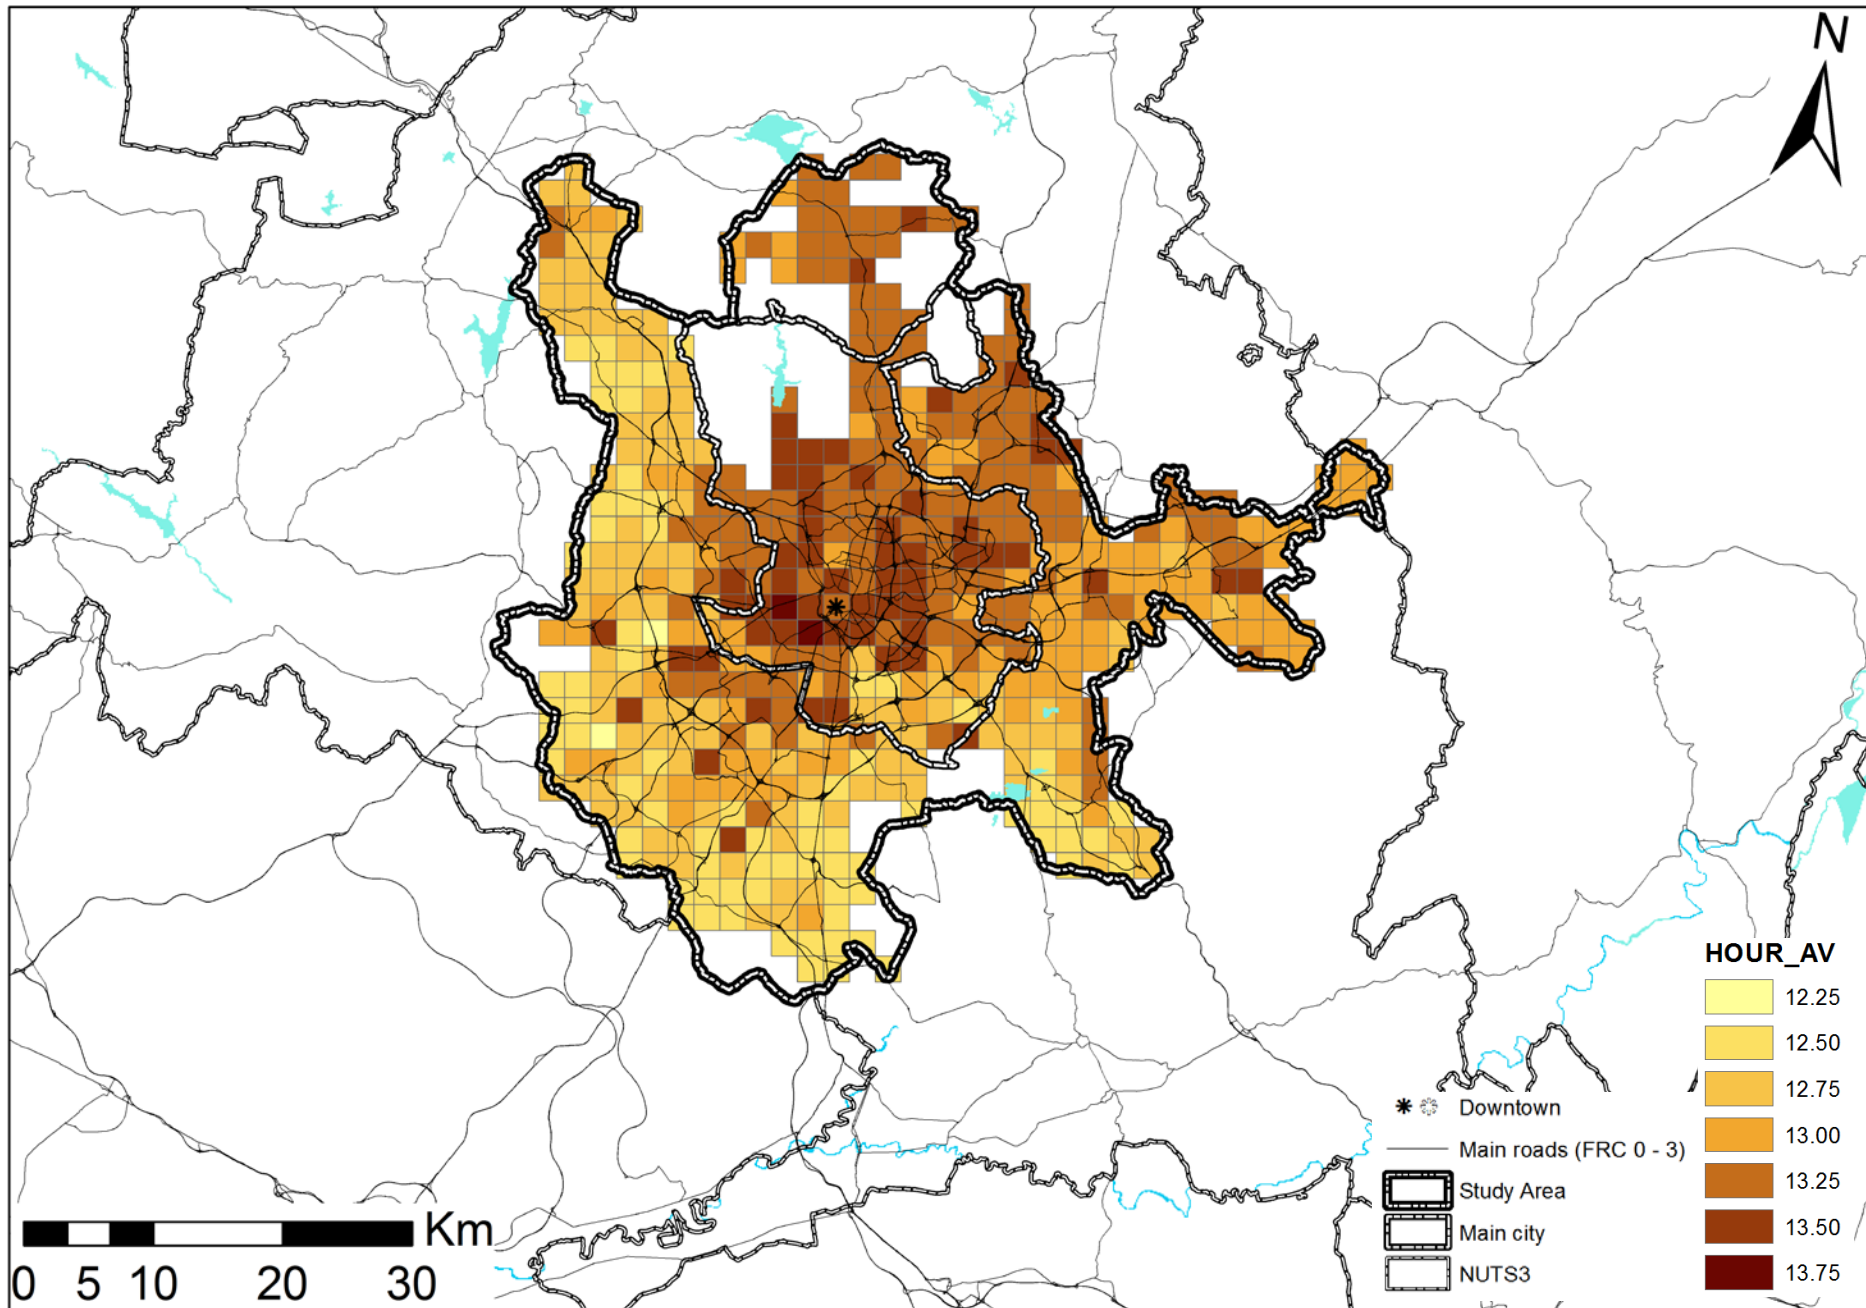

on Figure 6 (*Hour min. accessibility*)

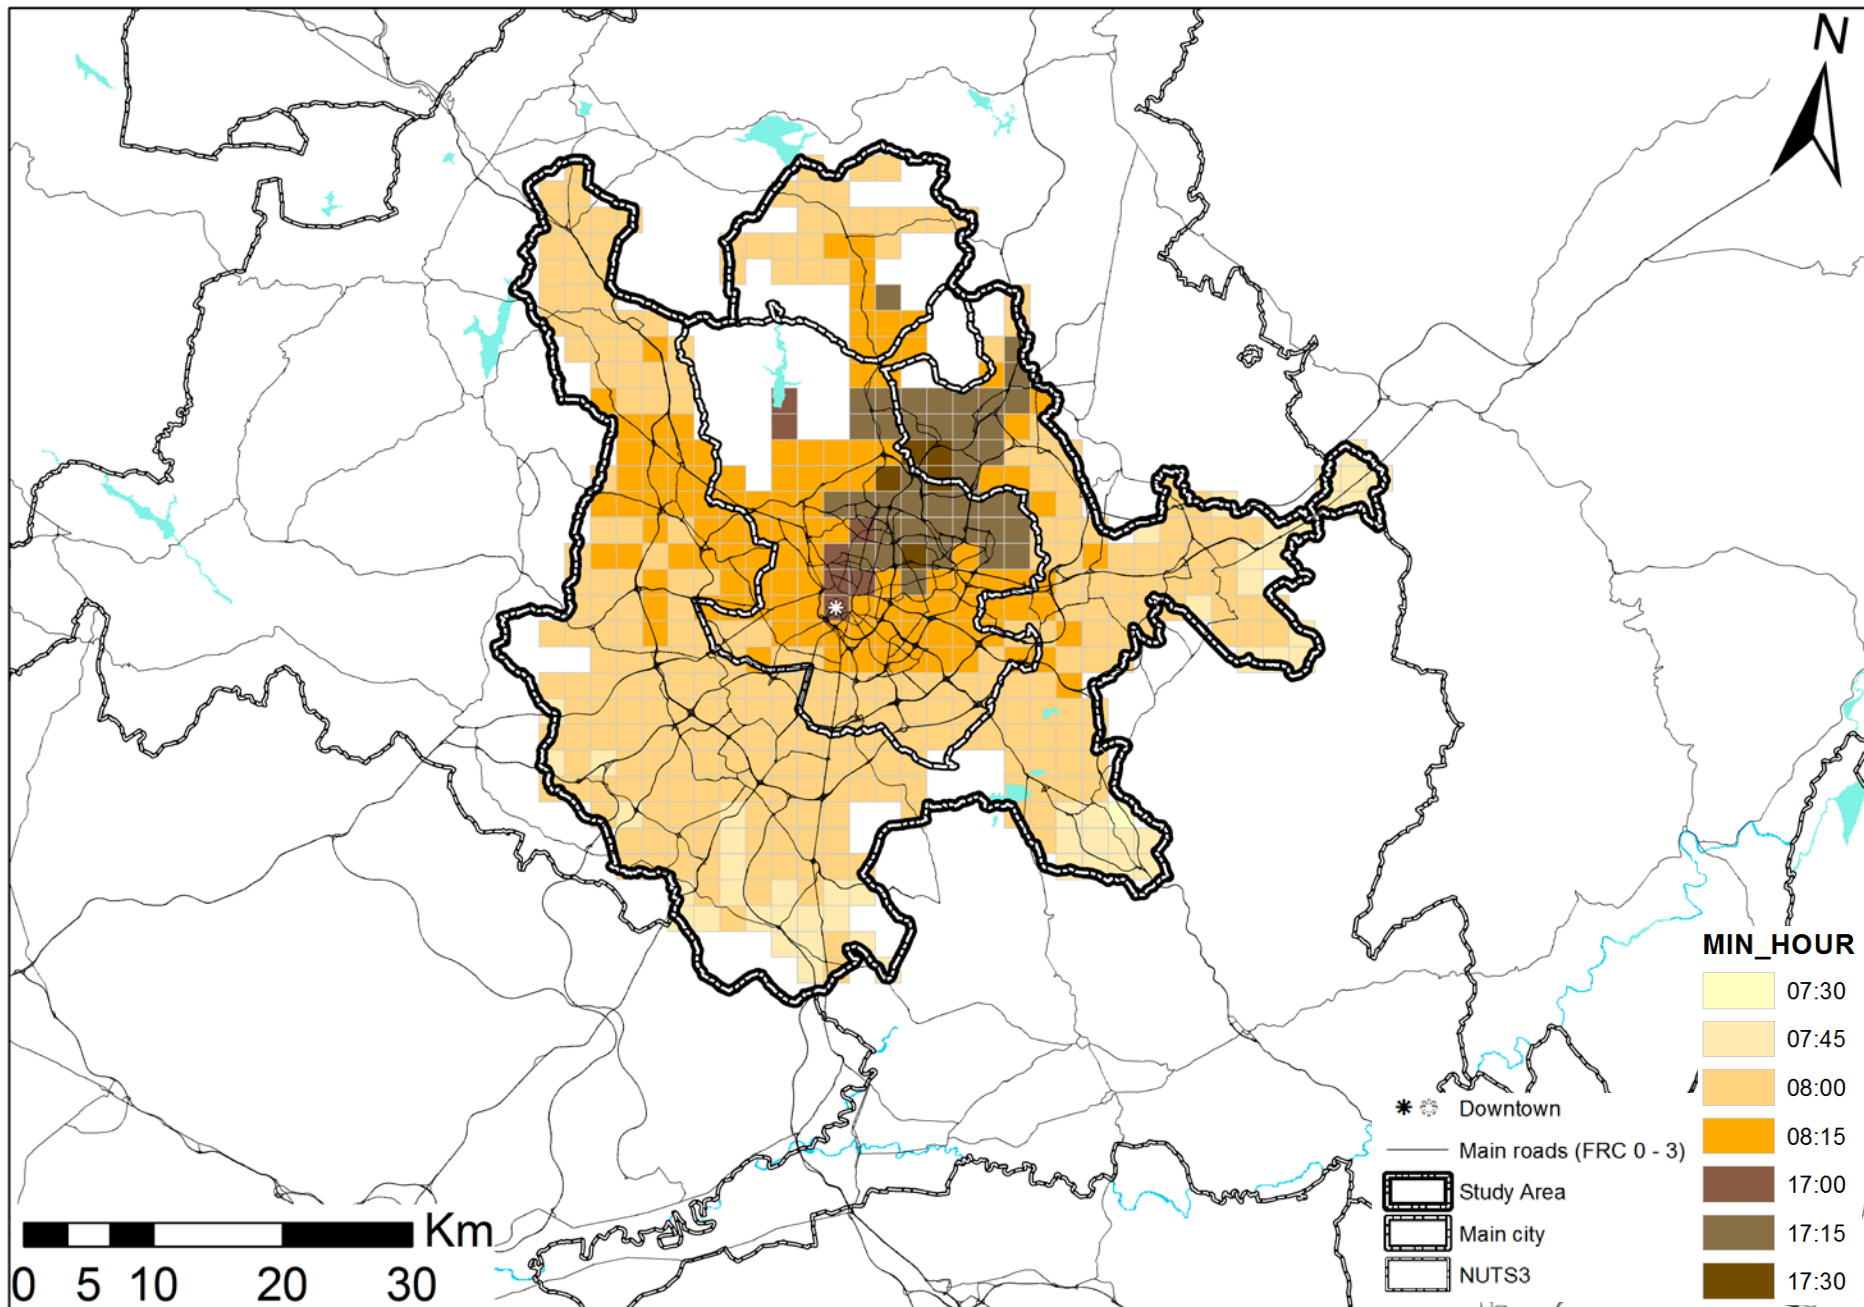

*European Transport Research Review*

Working with the daily variation in infrastructure performance on territorial accessibility. The cases of Madrid and Barcelona

**MOYA-GÓMEZ, BORJA (\*) and GARCÍA-PALOMARES, JUAN CARLOS**

***(\*) Corresponding author***

Transport, Infrastructure and Territory Research Group (t-GIS), Human Geography Department,  
Faculty of Geography and History, Universidad Complutense de Madrid (UCM)  
Phone: +34 91 394 57 51, Fax: +34 91 394 59 60, e-mail: [bmoagomez@ucm.es](mailto:bmoagomez@ucm.es)
